# Supplementary material
Source: Springer Nature journal article supplement (https://www.springermedizin.de/resource/supplementary/12885_2005_292_MOESM3_ESM.pdf/9469128)

# GIRK1

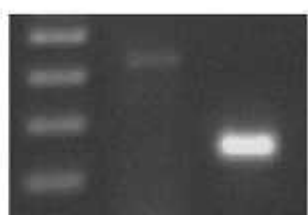

M

GIRK1

Cyclo.

A549

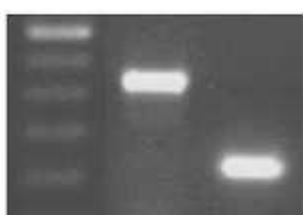

M

GIRK1

Cyclo.

H727

# GIRK2 & GIRK4

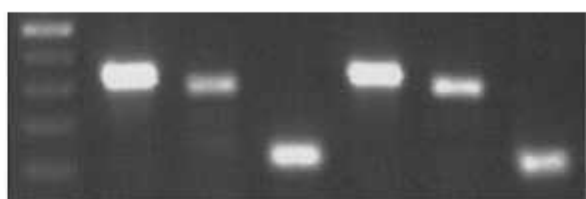

M

GIRK2

GIRK4

Cyclo.

GIRK2

GIRK4

Cyclo.

A549

H727

Supplement: MOESM3 [file 9469128]
